# Supplementary material
Source: MDPI journal article supplement (https://www.mdpi.com/2073-445X/10/12/1392)
Supplement: s1 [file s1]

## Supplementary Materials

### Enriched Biochar with Buffalo Slurry on Soil Nitrogen, Carbon Dynamics, Leaching Losses of Nutrients and Growth Attributes of Wheat

Javeed et al

This file contains the table (Table S1) about the Physiochemical properties of both soils before the start of the experiment

Table S1 Physiochemical properties of both soils before the start of the experiment

| Particular                             | Soil A | Soil B |
|----------------------------------------|--------|--------|
| <b>Textural Analysis (%)</b>           |        |        |
| Clay                                   | 71     | 15     |
| Silt                                   | 16     | 12     |
| Sand                                   | 13     | 73     |
| <b>Soil physicochemical Properties</b> |        |        |
| SOC (%)                                | 0.61   | 0.49   |
| pH (1:1)                               | 7.91   | 7.66   |
| CEC (dSm-1)                            | 1.91   | 1.71   |
| FC (%)                                 | 24.11  | 20.11  |
| WP (%)                                 | 7.51   | 6.21   |
| Bulk density (g cm-3)                  | 1.61   | 1.48   |
| CaCo3 (%)                              | 3.45   | 11.42  |
| <b>Soil nutrient contents</b>          |        |        |
| N (mg kg-1)                            | 5.74   | 4.61   |
| P (mg kg-1)                            | 7.91   | 6.78   |
| K (mg kg-1)                            | 13.21  | 11.91  |

Abbreviation: SOM; soil organic matter, CEC; cation exchange capacity, FC; field capacity, WP; wilting point
